# Supplementary material for: Applying a computational transcriptomics-based drug repositioning pipeline to identify therapeutic candidates for endometriosis
Source: bioRxiv or medRxiv preprint supplement (doi:10.1101/2022.12.20.22283736), 2022-12-21
Supplement: Supplementary file [file media-1.pdf]

| <b>Cycle-Phase</b> | <b>Disease severity</b> |                    |                      | <b>Total</b> |
|--------------------|-------------------------|--------------------|----------------------|--------------|
|                    | <b>Control</b>          | <b>Stages I-II</b> | <b>Stages III-IV</b> |              |
| PE                 | 20                      | 10                 | 17                   | 47           |
| ESE                | 6                       | 6                  | 12                   | 24           |
| MSE                | 8                       | 8                  | 18                   | 34           |
| <b>Total</b>       | <b>34</b>               | <b>24</b>          | <b>47</b>            | <b>105</b>   |
